# Supplementary material for: Novel synthesis of polymer and carbonaceous nanomaterials via a micelle/silicate nanostructured precursor
Source: Royal Society of Chemistry journal article supplement (doi:10.1039/b204622a), 2002-01-01
Supplement: b204622a.pdf [file b204622a.pdf]

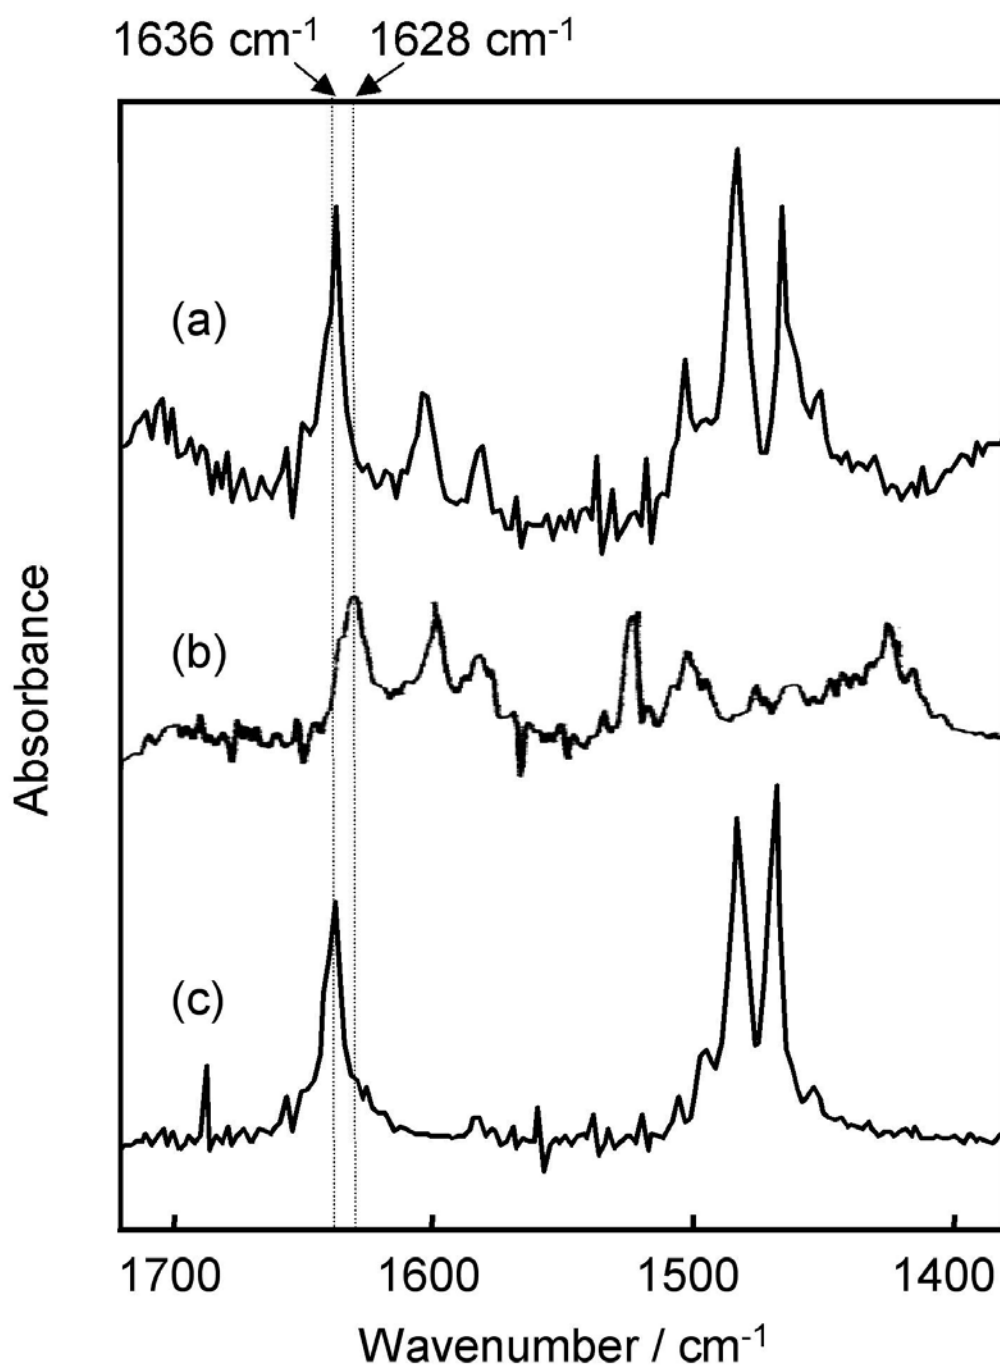

Figure IR spectra of (a) DVB/micelle/silicate composite heated at 110 °C, (b) DVB, and (c) micelle-forming compound (C<sub>16</sub>PyCl).
