# Supplementary figures and images for: Novel synthesis of polymer and carbonaceous nanomaterials via a micelle/silicate nanostructured precursor
Source: Royal Society of Chemistry journal article supplement (doi:10.1039/b204622a), 2002-01-01

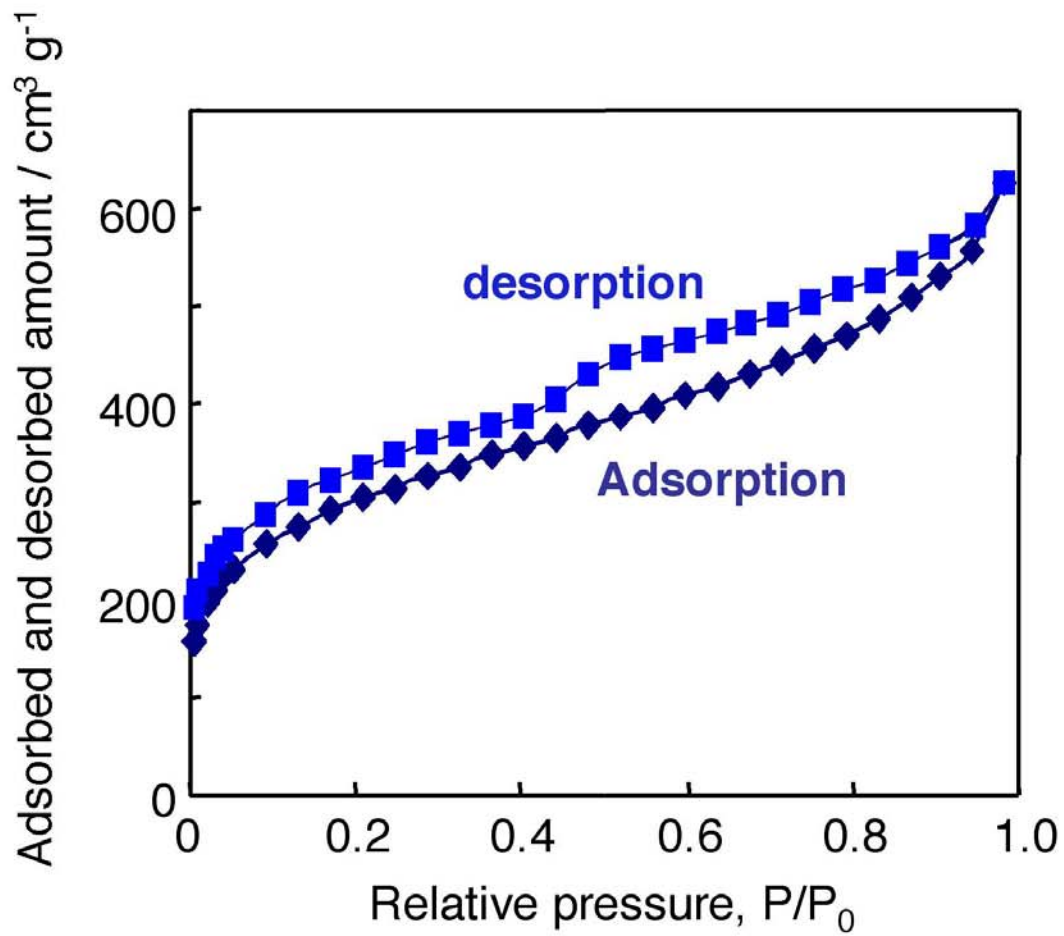

Figure Adsorption-desorption isotherms of N<sub>2</sub> at 77 K

Supplement: b204622a1.pdf [file b204622a1.pdf]
